# Mapping a Pandemic: SARS-CoV-2 Seropositivity in the United States

Heather Kalish<sup>\*1</sup>, Carleen Klumpp-Thomas<sup>\*2</sup>, Sally Hunsberger<sup>\*3</sup>, Holly Ann Baus<sup>4</sup>, Michael P Fay<sup>3</sup>, Nalyn Siripong<sup>5</sup>, Jing Wang<sup>6</sup>, Jennifer Hicks<sup>1</sup>, Jennifer Mehalko<sup>7</sup>, Jameson Travers<sup>2</sup>, Matthew Drew<sup>7</sup>, Kyle Pauly<sup>1</sup>, Jacquelyn Spathies<sup>1</sup>, Tran Ngo<sup>8</sup>, Kenneth M. Adusei<sup>8</sup>, Maria Karkanitsa<sup>8</sup>, Jennifer A Croker<sup>9</sup>, Yan Li<sup>10</sup>, Barry I. Graubard<sup>11</sup>, Lindsay Czajkowski<sup>4</sup>, Olivia Belliveau<sup>12</sup>, Cheryl Chairez<sup>12</sup>, Kelly Snead<sup>7</sup>, Peter Frank<sup>7</sup>, Anandakumar Shunmugavel<sup>8</sup>, Alison Han<sup>4</sup>, Luca T. Giurgea<sup>4</sup>, Luz Angela Rosas<sup>4</sup>, Rachel Bean<sup>4</sup>, Rani Athota<sup>4</sup>, Adriana Cervantes-Medina<sup>4</sup>, Monica Gouzoulis<sup>4</sup>, Brittany Heffelfinger<sup>4</sup>, Shannon Valenti<sup>5</sup>, Rocco Caldararo<sup>13</sup>, Michelle M. Kolberg<sup>14</sup>, Andrew Kelly<sup>2</sup>, Reid Simon<sup>2</sup>, Saifullah Shafiq<sup>2</sup>, Vanessa Wall<sup>7</sup>, Susan Reed<sup>4</sup>, Eric W Ford<sup>9</sup>, Ravi Lokwani<sup>8</sup>, John-Paul Denson<sup>7</sup>, Simon Messing<sup>7</sup>, Sam G. Michael<sup>2</sup>, William Gillette<sup>7</sup>, Robert P. Kimberly<sup>9</sup>, Steven E. Reis<sup>5</sup>, Matthew D. Hall<sup>2</sup>, Dominic Esposito<sup>7</sup>, Matthew J. Memoli<sup>4†</sup>, Kaitlyn Sadtler<sup>8†</sup>

<sup>1</sup>Trans-NIH Shared Resource on Biomedical Engineering and Physical Science, National Institute of Biomedical Imaging and Bioengineering, National Institutes of Health, Bethesda, MD 20894

<sup>2</sup>National Center for Advancing Translational Sciences, National Institutes of Health, Rockville, MD 20850

<sup>3</sup>Biostatistics Research Branch, National Institute of Allergy and Infectious Diseases, National Institutes of Health, Bethesda, MD 20894

<sup>4</sup>Clinical Studies Unit, Laboratory of Infectious Diseases, National Institute of Allergy and Infectious Diseases, National Institutes of Health, Bethesda, MD 20894

<sup>5</sup>Clinical and Translational Science Institute, University of Pittsburgh, Pittsburgh, Pennsylvania

<sup>6</sup>Clinical Monitoring Research Program Directorate, Frederick National Laboratory for Cancer Research, Frederick MD 21702

<sup>7</sup>Protein Expression Laboratory, NCI RAS Initiative, Frederick National Laboratory for Cancer Research, Frederick MD 21702

<sup>8</sup>Section on Immuno-Engineering, National Institute of Biomedical Imaging and Bioengineering, National Institutes of Health, Bethesda, MD 20894

<sup>9</sup>Center for Clinical and Translational Science, School of Medicine, University of Alabama at Birmingham, Birmingham, AL 35294

<sup>10</sup>Joint Program in Survey Methodology, Department of Epidemiology and Biostatistics, University of Maryland College Park, College Park, MD 20742

<sup>11</sup>Division of Cancer Epidemiology & Genetics, Biostatistics Branch, National Cancer Institute, National Institutes of Health, Bethesda MD 20894

<sup>12</sup>Laboratory of Immunoregulation, National Institute of Allergy and Infectious Diseases, National Institutes of Health, Bethesda, MD 20894

<sup>13</sup>Clinical Research Directorate, Frederick National Laboratory for Cancer Research, Leidos Biomedical Research, Inc, Frederick MD 21702

<sup>14</sup>Division of Clinical Research, National Institute of Allergy and Infectious Diseases, National Institutes of Health, Bethesda, MD 20894

\*these authors contributed equally

†Address correspondence to: Dr. Matthew Memoli ([memolim@nih.gov](mailto:memolim@nih.gov)) or Dr. Kaitlyn Sadtler ([kaitlyn.sadtler@nih.gov](mailto:kaitlyn.sadtler@nih.gov))

45 **ABSTRACT**

46

47 Asymptomatic SARS-CoV-2 infection and delayed implementation of diagnostics have led to poorly  
48 defined viral prevalence rates. To address this, we analyzed seropositivity in US adults who have not  
49 previously been diagnosed with COVID-19. Individuals with characteristics that reflect the US population  
50 ( $n = 11,382$ ) and who had not previously been diagnosed with COVID-19 were selected by quota sampling  
51 from 241,424 volunteers (ClinicalTrials.gov NCT04334954). Enrolled participants provided medical,  
52 geographic, demographic, and socioeconomic information and 9,028 blood samples. The majority (88.7%)  
53 of samples were collected between May 10<sup>th</sup> and July 31<sup>st</sup>, 2020. Samples were analyzed via ELISA for  
54 anti-Spike and anti-RBD antibodies. Estimation of seroprevalence was performed by using a weighted  
55 analysis to reflect the US population. We detected an undiagnosed seropositivity rate of 4.6% (95% CI: 2.6  
56 – 6.5%). There was distinct regional variability, with heightened seropositivity in locations of early  
57 outbreaks. Subgroup analysis demonstrated that the highest estimated undiagnosed seropositivity within  
58 groups was detected in younger participants (ages 18-45, 5.9%), females (5.5%), Black/African American  
59 (14.2%), Hispanic (6.1%), and Urban residents (5.3%), and lower undiagnosed seropositivity in those with  
60 chronic diseases. During the first wave of infection over the spring/summer of 2020 an estimate of 4.6% of  
61 adults had a prior undiagnosed SARS-CoV-2 infection. These data indicate that there were 4.8 (95% CI:  
62 2.8-6.8) undiagnosed cases for every diagnosed case of COVID-19 during this same time period in the  
63 United States, and an estimated 16.8 million undiagnosed cases by mid-July 2020.

64 **INTRODUCTION**

65

66 COVID-19, the disease caused by SARS-CoV-2 infection, presents with a spectrum of illness ranging from  
67 asymptomatic to severe disease and death. As with most respiratory viral diseases, it is difficult to estimate  
68 the true prevalence of the disease during a pandemic and the extent of its spread is only known after  
69 extensive study<sup>1-3</sup>. The majority of patients infected develop robust antibody responses against the viral  
70 spike (S), nucleocapsid (N), and envelope (E) proteins that can be detected via serologic testing<sup>4-8</sup>. Anti-S  
71 antibodies persist for months, and can neutralize infection<sup>9</sup>. Frequently, these neutralizing antibodies bind  
72 the receptor binding domain (RBD) of the spike protein, but antibodies against the spike S2 domain have  
73 also been observed<sup>10-15</sup>.

74

75 To characterize the spread of SARS-CoV-2 infection in the United States, we evaluated seropositivity in a  
76 national survey of participants who had not previously been diagnosed with SARS-CoV-2 infection. We  
77 used quota sampling from a large pool of volunteers to obtain a representative sample and performed  
78 statistical weighting to generate prevalence estimates which provide a clear picture of the extent of SARS-  
79 CoV-2 infection. To ensure accurate classification of seropositivity, we utilized our dual-antigen ELISA  
80 protocol that evaluated IgG and IgM antibodies against both the full spike ectodomain and the RBD<sup>7,16</sup>.  
81 These foundational considerations generated critical data needed to estimate spread during the pandemic  
82 and gain insight into the potential future outcomes.

83

84 These results, including the subgroup analysis, give us a previously undescribed view into the spread of the  
85 pandemic by more clearly identifying the large numbers of individuals with undiagnosed infections during  
86 the initial months of the pandemic. These data are of great importance as we consider the impact vaccination  
87 may have on the future course of the pandemic and plan for current and future available vaccines to be  
88 administered. In addition, these data can also help us better assess the public health measures taken during  
89 the pandemic and how to take the best approaches forward to any future public health emergencies.

90 **METHODS**

91

92 *Study Protocol:*

93

94 This study was designed to determine the seroprevalence of anti-SARS-CoV-2 antibodies in adults 18 years  
95 of age or older in the United States who had not been previously diagnosed with COVID-19. The primary  
96 endpoint was the weighted estimate of seroprevalence in the US. Secondary endpoints were weighted  
97 estimates for subgroups categorized by demographics/risk factors. An initial period enrolled a convenience  
98 sample of 593 volunteers prior to the quota sample. Participants across the US (all 50 states and DC) were  
99 then enrolled via telephone consent from a pool of volunteers who provided basic demographic data in  
100 response to the study announcement. Recruitment calls were made from three sites: NIAID Laboratory of  
101 Infectious Diseases Clinical Studies Unit, the University of Pittsburgh CTSI, and the University of Alabama  
102 at Birmingham CCTS. Selection of participants is described below. Selected participants were contacted  
103 by the study team, consented, and sent a blood microsampling kit and online questionnaire in REDCap  
104 (project-redcap.org). For a small subset of participants ( $n = 214$ ) working on the NIH campus, serum was  
105 collected via venipuncture. This study (ClinicalTrials.gov NCT04334954) was approved by the National  
106 Institutes of Health Institutional Review Board and conducted in accordance with the provisions of the  
107 Declaration of Helsinki and Good Clinical Practice guidelines. All participants provided verbal informed  
108 consent prior to enrollment.

109

110 *Participant Selection*

111

112 All volunteers were emailed an initial survey to collect basic demographic characteristics. Survey responses  
113 were de-identified and aggregated by sub-category of state, type of locality approximated from zip codes,  
114 age, sex, race, and ethnicity (**Figure 1**). Target sample sizes for these sub-categories were determined from  
115 the U.S. census, and were updated every evening based on the characteristics of people who had already  
116 enrolled to assure that individuals in each sub-category were enrolled evenly over time. Within each sub-  
117 category, participants were initially assigned a selection probability calculated from the target number as a  
118 proportion of the available pool. Specific sub-categories that had insufficient numbers were aggregated to  
119 estimate their impact on the overall distribution of the 6 main characteristics. If a particular characteristic  
120 had insufficient numbers, sample probabilities were boosted for volunteers who had the characteristic. For  
121 each day's call list, the most representative of 20,000 randomly generated lists was used, each list drawn  
122 without replacement from the volunteer pool based on the sampling probabilities previously defined.  
123 Representativeness was assessed by estimating a weighted sum of squared differences from the desired

124 targets and picking the list with the lowest deviation. Unselected participants were eligible to be called at a  
125 later date. This algorithm is designed such that each cohort of invited participants is representative of the  
126 diversity of the US population with respect to the 6 sampling variables (see Statistical Supplement Section  
127 3.4).

128

#### 129 *Sample Collection:*

130

131 Participants provided blood samples by mail using a Mitra microsampling kit (Neoteryx, Torrance, CA) or  
132 standard venipuncture. Microsampling kits contained visual instructions on the sampling process, bandages,  
133 gauze, lancets, and four 20  $\mu$ l microsampling devices for a total collection of 80  $\mu$ l of whole blood.  
134 Participants utilized the lancet to draw blood from their fingertip and collect blood onto each of the four  
135 microsamplers. Participants returned the dried microsamplers with desiccant via overnight shipping. Those  
136 who underwent venipuncture did so in the NIH Clinical Center phlebotomy lab where 18 ml of blood was  
137 collected in a serum separator and whole blood tube. Once received in the laboratory serum samples were  
138 processed, and microsamplers were stored dry at  $-80^{\circ}\text{C}$  until elution and analysis.

139

#### 140 *Serologic Assays:*

141

142 Antibodies from samples were analyzed using ELISA as previously described<sup>7,16-18</sup>. In order to maintain  
143 longitudinal quality control and ensure that the assays remained stable across multiple months of assay  
144 implementation, positive and negative controls were included on each assay plate and monitored for  
145 stability (**Supplemental Fig. 1**). Seropositivity cut points were defined by evaluating 300 true negative  
146 samples and 56 true positive samples. Positivity thresholds were based on the mean optical density  
147 (absorbance) plus 3 standard deviations (see Supplemental Materials for details). The final criterion of a  
148 Spike<sup>+</sup> and RBD<sup>+</sup> for any combination of IgG or IgM gave estimated sensitivity and specificity of 1, with  
149 raw values for recombinant antibody results reported in **Supplemental Fig. 2** and **Supplemental Table 1**.  
150 Additionally, IgA was evaluated via previously described ELISA to further phenotype the participant's  
151 serologic status.

152

#### 153 *Statistical Analysis*

154

155 The previously described iterative quota sampling continuously matched the proportion of people in the  
156 study with the census estimated proportion of people in the country on 6 variables (**Table 1, Figure 1**).  
157 This ensured that each periodic sample of participants over the course of the study were representative, and

158 the time effects of the pandemic were approximately independent of those 6 variables. Each participant was  
159 asked demographic and health-related questions that matched ones on the Behavioral Risk Factor  
160 Surveillance System (BRFSS) survey, a large probability-based national survey<sup>19</sup>. Responses to those  
161 matching questions were used with BRFSS survey data to adjust estimators to account for important criteria  
162 that may be related to both selection probability and seropositivity but were not accounted for in the quota  
163 sampling. Those adjusted estimators used weighting based on the propensity of being a quota sample versus  
164 a BRFSS sample participant and poststratification to US census data. It additionally accounted for  
165 sensitivity and specificity. Confidence intervals were calculated for the final seroprevalence estimates  
166 accounting for both the variability of the weighting and of the sensitivity and specificity adjustment. The  
167 ratio of undiagnosed cases over diagnosed cases was estimated as the final seroprevalence estimate times a  
168 factor calculated from the daily national population and diagnosed cases. For more methods and details see  
169 Section 3 of the **Supplementary Materials**.

170

## 171 **RESULTS**

172

### 173 *Enrollment and Demographic Representation*

174

175 Recruitment took place from April 1, 2020 until August 4, 2020. During that time 11,283 participants were  
176 enrolled from a pool of 241,424 volunteers. Of these participants, 214 had blood collected via venipuncture  
177 and 11,069 were sent microsamplers. Over 80% of the microsamplers were returned (9,089 participants).  
178 Ultimately 9,028 participant samples were analyzed via ELISA for presence of SARS-CoV-2 antibodies.  
179 Of those, 8,058 participants had complete clinical questionnaire data and were included in the weighted  
180 analysis (**Figure 1**). The majority (>88%) of sample collection occurred within the 11-week period between  
181 May 10<sup>th</sup> to July 31<sup>st</sup>, 2020 (**Supplemental Fig. 3**). The six major demographic factors used in participant  
182 selection are summarized in **Table 1**. Participant sampling was highly representative of the U.S. population.  
183 When expanded to include the additional 10 demographic or health related factors captured by the BRFSS,  
184 many factors were well matched, but there were some differences: our sample population was more highly  
185 educated, employed, and had better access to healthcare (**Table 1**).

186

### 187 *Estimates of Seroprevalence*

188

189 There were 304 seropositive participants in the analysis set (**Figure 2a,b**). This gave a weighted estimate  
190 of 4.6% of the undiagnosed adults in the U.S. population that were seropositive for SARS-CoV-2 (95% CI:  
191 2.6% to 6.5%,  $n = 8058$  complete testing and survey). Using this average rate over the study period, we

192 estimate that there were 4.8 undiagnosed cases per each diagnosed case over the course of the study (95%  
193 CI: 2.8, 6.8). In seropositive participants, 36.51% were IgG<sup>+</sup>IgM<sup>+</sup>IgA<sup>+</sup>, 28.29 % were IgG<sup>+</sup>IgM<sup>-</sup>IgA<sup>+</sup>,  
194 17.11% were IgG<sup>+</sup>IgM<sup>-</sup>IgA<sup>-</sup>, 13.16 % were IgG<sup>-</sup>IgM<sup>+</sup>IgA<sup>-</sup>, 4.28 % were IgG<sup>-</sup>IgM<sup>-</sup>IgA<sup>-</sup>, and 0.66 % were  
195 IgG<sup>-</sup>IgM<sup>+</sup>IgA<sup>+</sup> (**Figure 2a-c, Supplemental Fig. 4**).

196  
197 We found regional variations of seroprevalence estimates across the US (**Fig. 2d, 3**). The Northeast and  
198 Mid-Atlantic Regions showed the highest rates of seropositivity whereas the lowest in the Midwest. Urban  
199 areas were estimated to have higher levels of seropositivity (5.3%) compared to rural areas (1.1%  
200 seropositivity) at the time samples were collected. Estimates of seroprevalence were calculated for other  
201 demographic subgroups (**Figure 3**). The youngest age group, 18-44, had the highest estimated  
202 seropositivity (5.9%). Estimated seroprevalence for females was 5.5% and 3.5% in males. The  
203 seroprevalence estimate for Black/African Americans was highest at 14.2% followed by participants who  
204 self-identified as other/unlisted race (11.1%), American Indian/Alaska Native (6.8%), followed by  
205 White/Caucasian (2.5%), while those identifying as Asian displayed the lowest seroprevalence estimate  
206 (2.0%).

207  
208 Participants who reported a known exposure to a SARS-CoV-2-infected individual had a higher  
209 seroprevalence estimate (15.6%) compared to those who did not (2.7%). In comparison to the national  
210 average (4.6%), those that worked from home had a lower seropositivity estimate of 3.0%. Those who  
211 reported prior vaccination (influenza 3.2% and/or pneumonia 2.3%) had a lower likelihood for undiagnosed  
212 seropositivity. Those who had health conditions associated with poor outcomes in SARS-CoV-2 infection,  
213 including coronary heart disease, asthma, and diabetes, displayed lower rates of seropositivity (**Figure 4**).  
214 Other health conditions were also correlated with a decreased seropositivity rate such as skin cancer, stroke,  
215 or arthritis.

## 216 217 **DISCUSSION**

218  
219 This study demonstrates that spread of the SARS-CoV-2 virus in the US during the first six months of the  
220 pandemic was more widespread than has been suggested by data reporting diagnostic test-confirmed cases.  
221 Similar to responses to other respiratory viruses, such as influenza, many individuals develop asymptomatic  
222 or mild disease that is not medically attended and therefore never diagnosed. Our findings indicate that  
223 there are nearly five individuals with a previous asymptomatic infection for every diagnosed case.  
224 Furthermore, patterns of our seroprevalence data match well with those of diagnosed cases reported during  
225 a similar timeframe.<sup>20</sup> For example, the greater seropositivity estimated in densely populated urban areas

226 follows the observed initial spread of SARS-CoV-2. In comparison to the national average, we found that  
227 the Midwest, South, and West had lower seroprevalences during the study timeframe, which preceded a  
228 substantial increase in infections in these regions detected by viral testing.

229

230 Our data suggest that the youngest age group had the highest undiagnosed seroprevalence, which is  
231 consistent with observations that they display less severe symptoms than older patients<sup>21</sup>. We also found  
232 higher undiagnosed seroprevalence in females, possibly suggesting a higher risk for asymptomatic disease.  
233 Participants with chronic diseases that are more likely to be associated with severe clinical manifestations  
234 of COVID-19, including diabetes, heart disease, and asthma, had a lower prevalence of asymptomatic  
235 SARS-CoV-2 infection in comparison to the national average. Those with known exposure to SARS-CoV-  
236 2 infected individuals had a higher estimated incidence of undiagnosed seropositivity. We also found that  
237 Black, African American, and Hispanic participants had higher undiagnosed seropositivity, correlating with  
238 national data on disease burden in these sub-groups.

239

240 This study is the first to report a representative sample across the US and to evaluate regional, demographic  
241 and socioeconomic differences in the prevalence of asymptomatic SARS-CoV-2 infection. In contrast,  
242 other reports of seroprevalence data focus on a specific group of individuals or geographic location<sup>22</sup>. Our  
243 results provide new insight into the spread of SARS-CoV-2. Our estimate of the national undiagnosed  
244 exposure rate provides information on the scope of infection during the first six months of the pandemic.  
245 This work extends findings from smaller foundational studies of limited populations<sup>23-37</sup> by generating an  
246 accurate estimate of nationwide and subgroup prevalence.

247

248 Our results estimate that there are approximately 4.8 undiagnosed cases (95% CI 2.76-6.81) for every  
249 identified case of COVID-19, suggesting a potential 16.8 million undiagnosed cases by mid-July 2020 in  
250 addition to the reported 3 million diagnosed cases in the United States. These data suggest a higher level of  
251 infection-induced immunity exists in the population and the size of those with this immunity is even greater  
252 now as the virus continued to spread in the months since this study was performed. Further long-term  
253 studies of immunity in the population will be necessary to further understand durability of response to the  
254 vaccine versus infection, how infection-induced immunity impacts vaccine response and performance, and  
255 if herd immunity can play a role in controlling SARS-CoV-2 spread. In addition, further subgroup analysis  
256 of our data will be useful in clarifying the spread of disease in the presence of public health measures and  
257 how we may be able to refine and further target those measures in the future.

258

259



260 *Limitations*

261

262 Although we were able to recruit a cohort with demographics representative of the general US population,  
263 our study has several limitations. First, although extensive statistical adjustments were made, our study  
264 cohort is based on a non-random volunteer sample which can have selection bias. However, many  
265 traditional random sampling studies using probability sampling design have very low response rates, calling  
266 into question the advantages of that practice<sup>38,39</sup>. Our study population also exhibited some differences from  
267 the general US population, such as higher education level and access to healthcare that had to be adjusted  
268 for with statistical weighting. We utilized both census and behavioral data to weight our results though it is  
269 possible that there are variables associated with disease transmission that are not accounted for in our  
270 weighting.

271

## 272 **CONCLUSIONS**

273

274 These data suggest a much larger spread of the COVID-19 pandemic than originally thought and have  
275 implications in basic understanding of SARS-CoV-2 spread, epidemiologic characteristics of its spread and  
276 prevalence in different communities, and potential impact on decisions involved in vaccine rollout.  
277 Continued large-scale surveillance of SARS-CoV-2 immunity is in progress, discriminating infection-based  
278 and vaccine-induced antibody responses, and mathematical models will be generated to understand the  
279 pandemic, vaccine performance, public health measure efficacy, and providing insight for our approach to  
280 handling the next virus with pandemic potential.

281 **ACKNOWLEDGEMENTS**

282

283 Firstly, we would like to thank the participants in this study, without whom it would not have been possible.  
284 The authors would like to acknowledge Dr. Corbett and Dr. Graham of the NIAID VRC for their generous  
285 donation of coronavirus spike expression plasmid, and Dr. Aaron Schmidt, J Feldman, BM Hauser and T  
286 M Caradonna of the Ragon Institute of MGH, MIT, and Harvard for their donation of their RBD expression  
287 plasmid. We thank John Crissey and the CRIMSON team (NIAID, NIH) for their assistance and  
288 contributions to the study and data management. We thank Dr. Jason McLellan for scholarly discussions  
289 regarding the spike S-2P construct. We thank the CCTS Clinical Research Support Program (A. Delbridge,  
290 L. Dukes), UAB School of Public Health and its Survey Research Unit (L. Battle, J. Carson, M. DeRamus,  
291 T. Fields, T. Graham, T. Jackson, E. Pruitt, A. Underwood, P. Wolff), the University of Pittsburgh Clinical  
292 and Translational Science Institute staff and leadership (J. Avolio, L. Bash, S. Clayton, M. Cristinziano, K.  
293 Daw, C. Fascetti, E. Gyurisin, J. Huwe, N. Jones, D. Mathias, S. Mathias, A. Mykita, B. Petersen, M.  
294 Phillips, C. Rush, E. Shepherd, S. Shetty, A. Socci, L. Stearns, S. Ugbomah, K. Underwood, L. Yasko) and  
295 University of Pittsburgh Information Technology (D. McGaughey, S. Ritzman, T. Smith) for their  
296 contributions to this work. We would like to thank Mr. Denzel Bernard for his assistance with sample  
297 delivery, and Dr. Stephanie Ford-Scheimer for organizational assistance. This research was supported in  
298 part by the Intramural Research Program of the NIH, including the National Institute for Biomedical  
299 Imaging and Bioengineering, the National Institute of Allergy and Infectious Disease, and the National  
300 Center for Advancing Translational Sciences. This project has been funded in part with Federal funds from  
301 the National Cancer Institute, National Institutes of Health, under contract number HHSN261200800001E,  
302 75N91019D00024, Task Order No. 75N91019F00130, Clinical and Translational Science Awards Program  
303 grants UL1TR003096 (UAB) and UL1TR001857 (University of Pittsburgh). The content of this publication  
304 does not necessarily reflect the views or policies of the Department of Health and Human Services, nor  
305 does mention of trade names, commercial products, or organizations imply endorsement by the U.S.  
306 Government. Disclaimer: The NIH, its officers, and employees do not recommend or endorse any company,  
307 product, or service.

|                                      | US Population (BRFSS) |       |              | CoV2 Serosurvey Population |       |
|--------------------------------------|-----------------------|-------|--------------|----------------------------|-------|
|                                      | n                     | %     | weighted (%) | n                          | %     |
| <b>Selection Criteria</b>            |                       |       |              |                            |       |
| Region                               |                       |       |              |                            |       |
| North East                           | 91307                 | 21.19 | 17.6         | 1508                       | 16.7  |
| Midwest                              | 67110                 | 15.57 | 16.97        | 1445                       | 16.01 |
| Mid-Atlantic                         | 80979                 | 18.79 | 16.91        | 1833                       | 20.3  |
| South/Central                        | 60482                 | 14.03 | 15.35        | 1293                       | 14.32 |
| Mountain/Southwest                   | 86204                 | 20    | 15.89        | 1392                       | 15.42 |
| West/Pacific                         | 44866                 | 10.41 | 17.27        | 1557                       | 17.25 |
| Age Group                            |                       |       |              |                            |       |
| 18 - 45                              | 125081                | 28.59 | 46           | 3837                       | 42.51 |
| 45 - 70                              | 207749                | 47.49 | 39.84        | 3783                       | 41.91 |
| 70 - 95                              | 104605                | 23.91 | 14.17        | 1407                       | 15.59 |
| Sex                                  |                       |       |              |                            |       |
| Male                                 | 197411                | 45.24 | 48.66        | 4318                       | 47.83 |
| Female                               | 238911                | 54.76 | 51.34        | 4710                       | 52.17 |
| Urban/Rural                          |                       |       |              |                            |       |
| Urban                                | 365714                | 84.9  | 93.48        | 8550                       | 94.78 |
| Rural                                | 65234                 | 15.1  | 6.52         | 471                        | 5.22  |
| Race                                 |                       |       |              |                            |       |
| White only                           | 345710                | 81    | 73.41        | 6986                       | 77.4  |
| Black only                           | 37862                 | 8.87  | 12.9         | 830                        | 9.2   |
| Others                               | 43219                 | 10.13 | 13.69        | 1210                       | 13.41 |
| Ethnicity                            |                       |       |              |                            |       |
| Hispanic                             | 36941                 | 8.53  | 17.06        | 1495                       | 16.56 |
| Not Hispanic                         | 395931                | 91.47 | 82.94        | 7532                       | 83.44 |
| <b>Additional Weighting Criteria</b> |                       |       |              |                            |       |
| Children                             |                       |       |              |                            |       |
| Yes                                  | 113408                | 26.21 | 35.81        | 2943                       | 32.88 |
| No                                   | 319281                | 73.79 | 64.19        | 6009                       | 67.12 |
| Education                            |                       |       |              |                            |       |
| <=HS                                 | 151606                | 34.79 | 41.07        | 240                        | 2.68  |
| College                              | 119979                | 27.53 | 30.88        | 1284                       | 14.35 |
| >=College                            | 164229                | 37.68 | 28.05        | 7422                       | 82.96 |
| Homeowner                            |                       |       |              |                            |       |
| Own                                  | 305545                | 70.36 | 66.49        | 6635                       | 74.12 |

|                        |        |       |       |      |       |
|------------------------|--------|-------|-------|------|-------|
| Rent                   | 107208 | 24.69 | 27.32 | 1861 | 20.79 |
| Others                 | 21535  | 4.96  | 6.19  | 456  | 5.09  |
| Employment             |        |       |       |      |       |
| Employed               | 219493 | 50.75 | 57.74 | 6364 | 71.09 |
| NLF                    | 174920 | 40.45 | 31.38 | 2129 | 23.78 |
| Unemployed             | 38053  | 8.8   | 10.88 | 459  | 5.13  |
| Health Insurance       |        |       |       |      |       |
| Yes                    | 400028 | 91.86 | 87.85 | 8697 | 97.31 |
| No                     | 35433  | 8.14  | 12.15 | 240  | 2.69  |
| Flu Vaccinated         |        |       |       |      |       |
| Yes                    | 234727 | 59    | 50.62 | 6198 | 73.73 |
| No                     | 163124 | 41    | 49.38 | 2208 | 26.27 |
| Cardiovascular Disease |        |       |       |      |       |
| Yes                    | 52284  | 12.07 | 9.07  | 354  | 3.98  |
| No                     | 380985 | 87.93 | 90.93 | 8541 | 96.02 |
| Pulmonary Disease      |        |       |       |      |       |
| Yes                    | 84102  | 19.33 | 18.53 | 1671 | 18.96 |
| No                     | 350913 | 80.67 | 81.47 | 7140 | 81.04 |
| Immune Disease         |        |       |       |      |       |
| Yes                    | 170115 | 39.14 | 29.29 | 2039 | 23.1  |
| No                     | 264571 | 60.86 | 70.71 | 6787 | 76.9  |
| Diabetes               |        |       |       |      |       |
| Yes                    | 60703  | 13.9  | 11.41 | 482  | 5.41  |
| No                     | 375876 | 86.09 | 88.59 | 8430 | 94.59 |

309 **Table 1: Characteristics of serosurvey population in comparison to United States population.** Census  
310 and Behavioral Risk Factor Surveillance System (BRFSS, 2018) data on selection criteria were utilized for  
311 quota-based sampling. Other values from BRFSS were utilized for statistical weighting. The comparisons  
312 between the estimated proportions in the United States (BRFSS) versus our sample population for the  
313 SARS-CoV-2 serosurvey are displayed in this table.

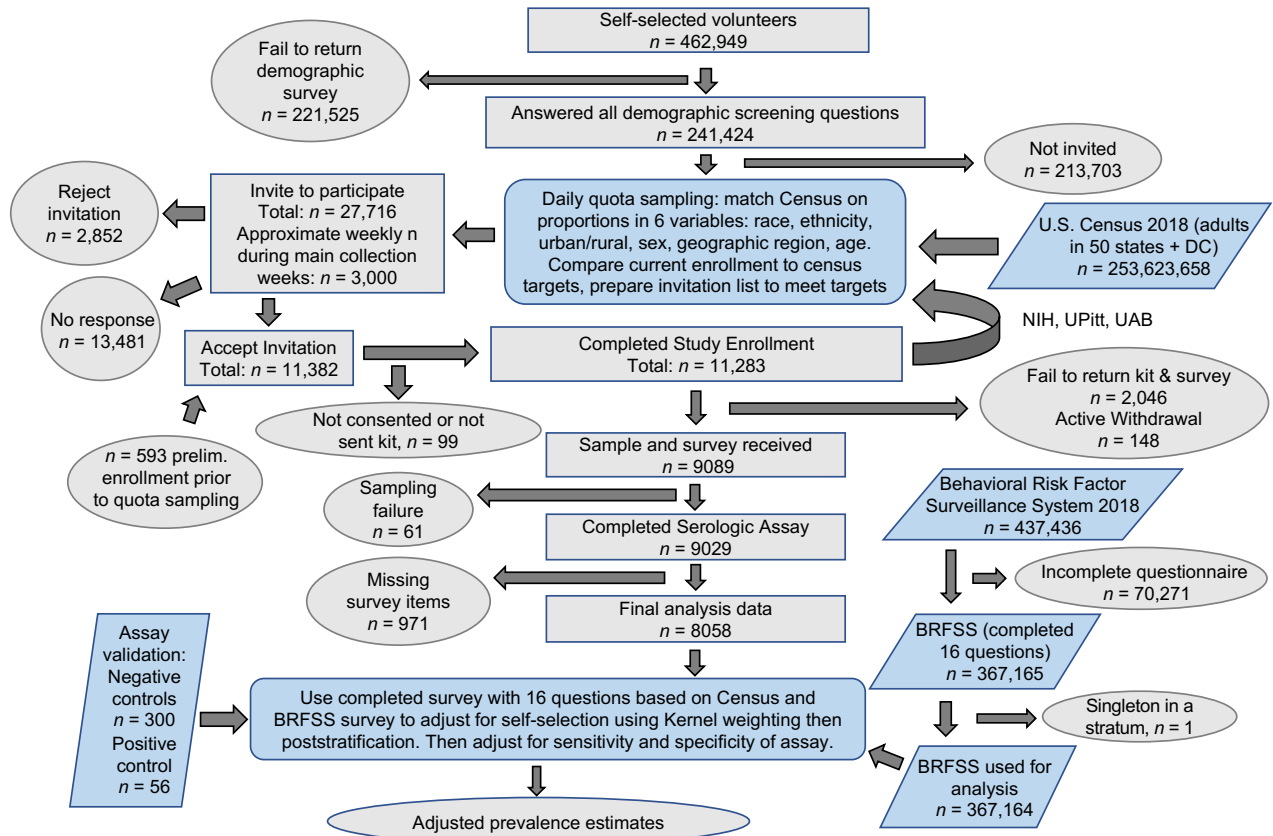

315

316

317 **Figure 1: Serosurvey overview and statistical workflow.** A flow chart of donor recruitment through data  
 318 analysis displaying steps in data acquisition and any attrition from data sets if applicable. Key: Ovals =  
 319 starts and ends, gray rectangles = subsets of participants in this study, blue parallelograms = individuals  
 320 from outside data sets that contribute to adjusted prevalence estimates, blue rounded rectangles = analysis  
 321 processes.

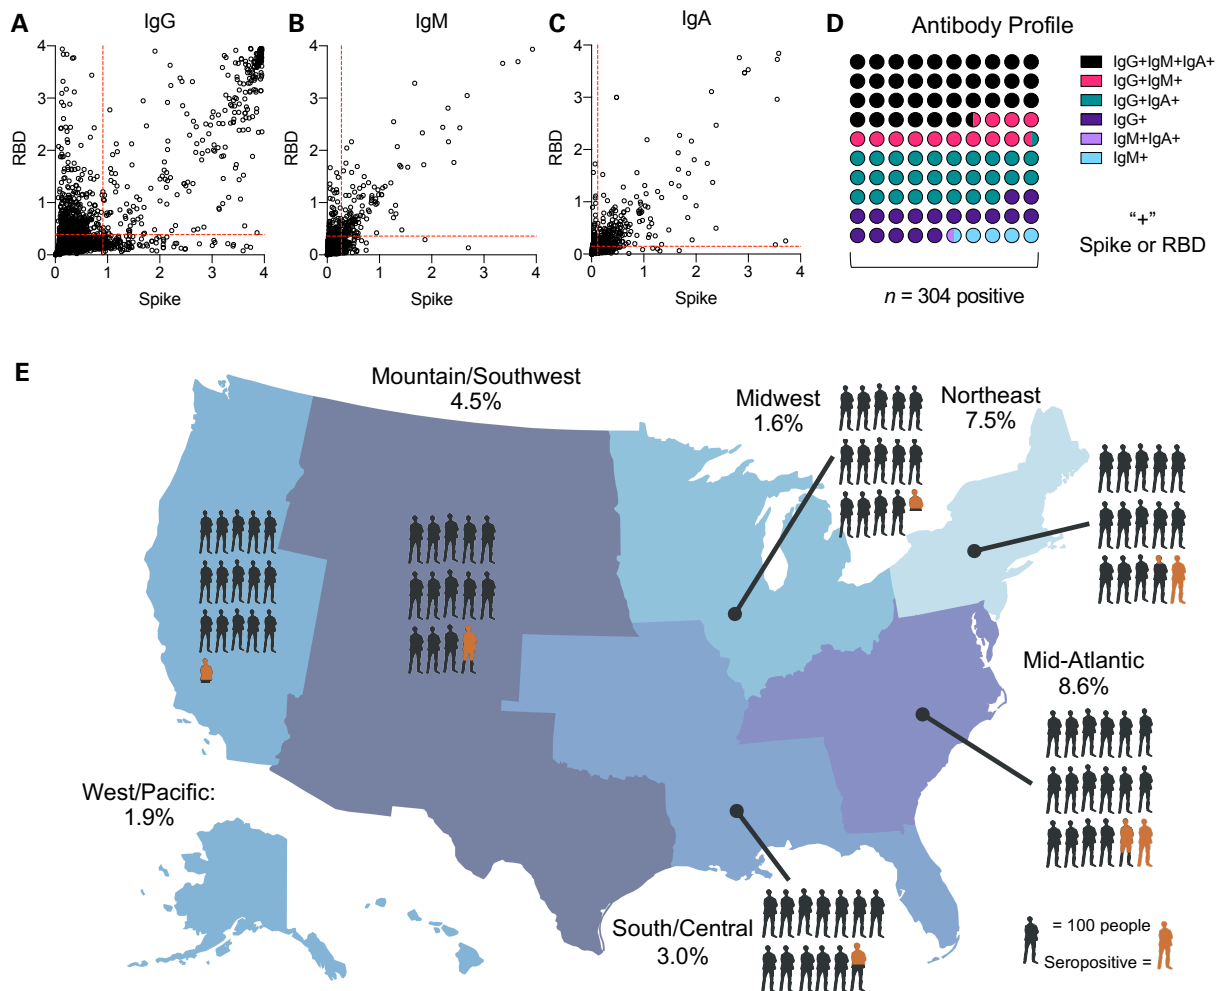

322

323 **Figure 2: Geographic distribution of undiagnosed seropositivity in the United States in summer 2020.**

324 Raw serology data for (a) IgG and (b) IgM and (c) IgA against SARS-CoV-2 Spike and Receptor Binding  
 325 Domain (RBD). Cut points for positivity are shown as red dashed lines, data are optical density (OD). (d)  
 326 Serologic phenotype of antibody presence in seropositive participants (e) US Map showing seropositivity  
 327 in six regions surveyed: Northeast = ME, NH, VT, MA, NY, CT, RI, PA, NJ, 7.5% (95% CI: 3.7 – 11.3%);  
 328 Midwest = MN, IA, WI, IL, IN, MI, OH, 1.6% (95% CI: 0.06-2.3%); Mid-Atlantic = MD, DE, DC, VA,  
 329 WV, KY, TN, NC, SC, GA, 8.6% (1.3 – 15.8%); South/Central = FL, MS, AL, LA, AR, MO, KS, OK,  
 330 3.0% (1.2 – 4.5%); Mountain/Southwest = TX, NM, AZ, CO, UT, WY, NE, SD, ND, MT, ID, 4.5% (0.09  
 331 – 7.9%); West/Pacific = WA, OR, NV, CA, AK, HI, 1.9% (0.02 – 3.2%). One person in diagram represents  
 332 100 participants, orange represents weighted prevalence estimate within the geographic region.

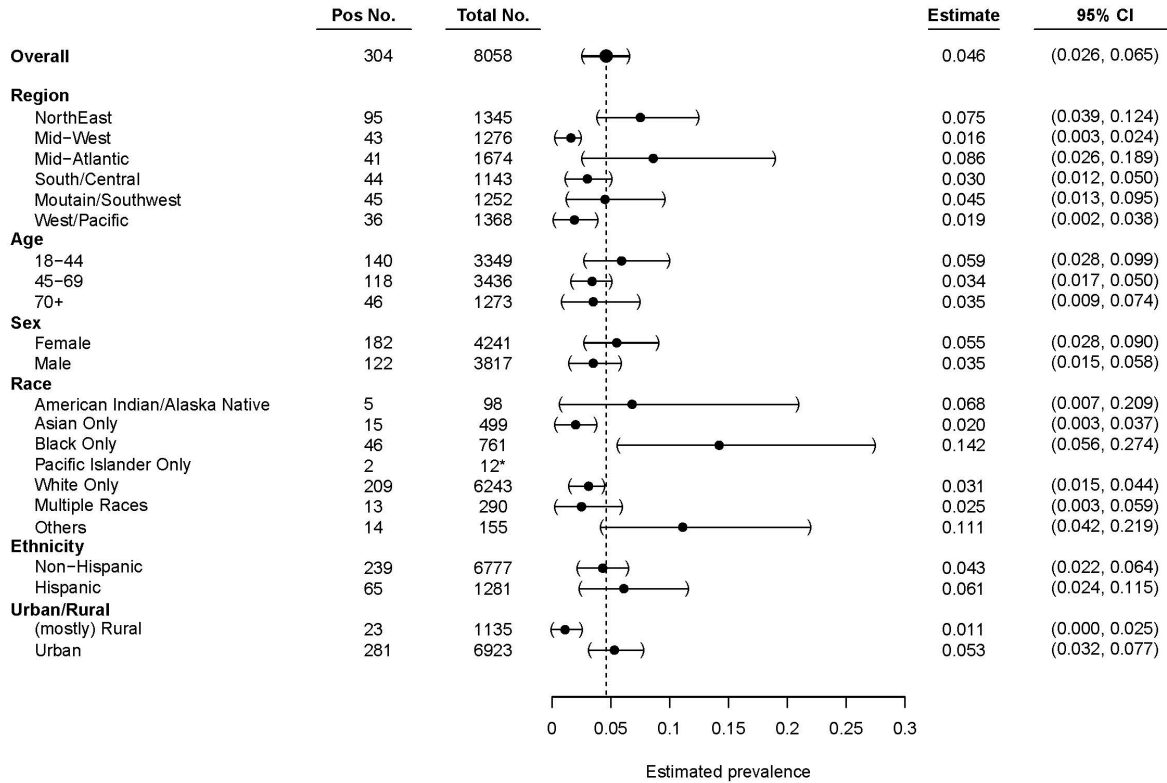

334 **Figure 3: Undiagnosed seroprevalence in main demographic categories.** Six main categories utilized  
 335 during quota-based sampling: region, age, sex, race, ethnicity, and urban/rural. Seropositivity estimates of  
 336 samples that had a full clinical questionnaire completed and successful sampling. Data are weighted  
 337 estimates  $\pm$  95% confidence intervals. Dashed line = weighted national seroprevalence estimate. \* = n value  
 338 too low to make proper weighted estimate, raw positivity displayed.

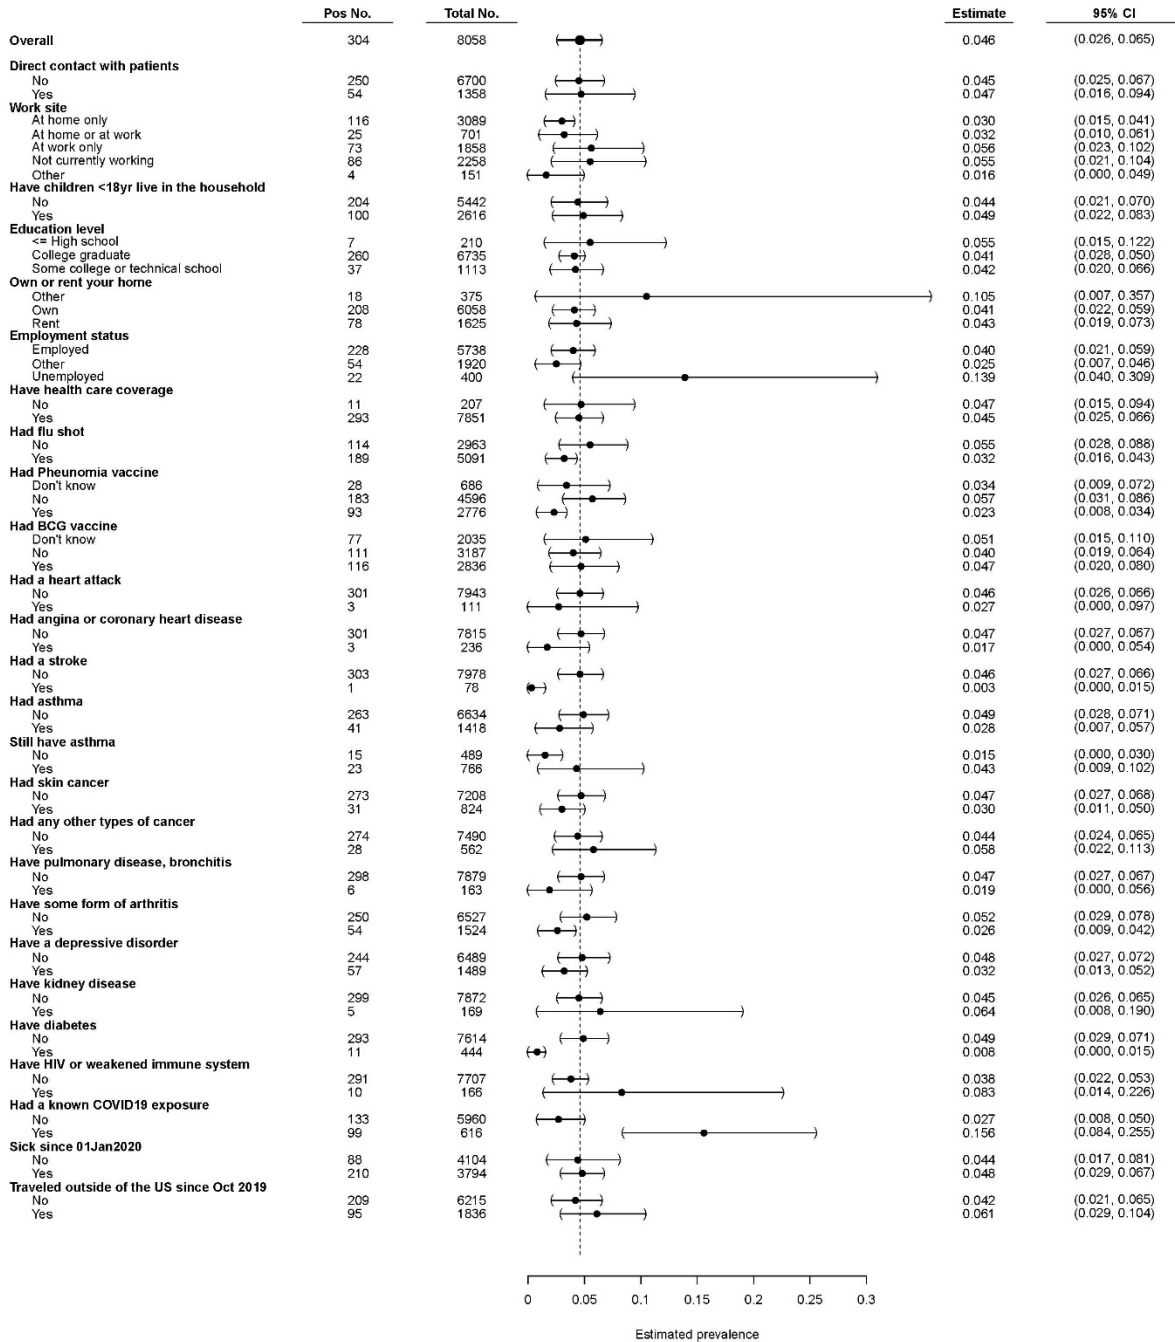

340 **Figure 4: Seroprevalence estimates of health and behavioral traits.** Seropositivity estimates of samples  
 341 that had a full clinical questionnaire completed and successful sampling. Data are weighted estimates ±  
 342 95% confidence intervals. Dashed line = weighted national seroprevalence estimate.



## REFERENCES

- 343  
344  
345 1. Fauci AS, Lane HC, Redfield RR. Covid-19—navigating the uncharted. In: Mass Medical Soc;  
346 2020.
- 347 2. Taubenberger JK, Morens DM. The pathology of influenza virus infections. *Annu Rev Pathol Mech*  
348 *Dis.* 2008;3:499-522.
- 349 3. Taubenberger JK, Morens DM. 1918 Influenza: the mother of all pandemics. *Revista Biomedica.*  
350 2006;17(1):69-79.
- 351 4. Huang AT, Garcia-Carreras B, Hitchings MD, et al. A systematic review of antibody mediated  
352 immunity to coronaviruses: antibody kinetics, correlates of protection, and association of antibody  
353 responses with severity of disease. *medRxiv.* 2020.
- 354 5. Long Q-X, Liu B-Z, Deng H-J, et al. Antibody responses to SARS-CoV-2 in patients with COVID-  
355 19. *Nature medicine.* 2020:1-4.
- 356 6. Ainsworth M, Andersson M, Auckland K, et al. Performance characteristics of five immunoassays  
357 for SARS-CoV-2: a head-to-head benchmark comparison. *The Lancet Infectious Diseases.* 2020.
- 358 7. Klumpp-Thomas C, Kalish H, Drew M, et al. Standardization of enzyme-linked immunosorbent  
359 assays for serosurveys of the SARS-CoV-2 pandemic using clinical and at-home blood sampling.  
360 *medRxiv.*
- 361 8. Stadlbauer D, Amanat F, Chromikova V, et al. SARS-CoV-2 Seroconversion in Humans: A  
362 Detailed Protocol for a Serological Assay, Antigen Production, and Test Setup. *Current Protocols*  
363 *in Microbiology.* 2020;57(1):e100.
- 364 9. Dan JM, Mateus J, Kato Y, et al. Immunological memory to SARS-CoV-2 assessed for greater  
365 than six months after infection. *bioRxiv.* 2020.
- 366 10. Chi X, Yan R, Zhang J, et al. A neutralizing human antibody binds to the N-terminal domain of the  
367 Spike protein of SARS-CoV-2. *Science.* 2020;369(6504):650-655.
- 368 11. He Y, Zhou Y, Liu S, et al. Receptor-binding domain of SARS-CoV spike protein induces highly  
369 potent neutralizing antibodies: implication for developing subunit vaccine. *Biochemical and*  
370 *biophysical research communications.* 2004;324(2):773-781.
- 371 12. Liu L, Wang P, Nair MS, et al. Potent neutralizing antibodies against multiple epitopes on SARS-  
372 CoV-2 spike. *Nature.* 2020;584(7821):450-456.
- 373 13. Pinto D, Park Y-J, Beltramello M, et al. Cross-neutralization of SARS-CoV-2 by a human  
374 monoclonal SARS-CoV antibody. *Nature.* 2020:1-6.
- 375 14. Shi R, Shan C, Duan X, et al. A human neutralizing antibody targets the receptor binding site of  
376 SARS-CoV-2. *Nature.* 2020:1-8.
- 377 15. Wang Z, Lorenzi JC, Muecksch F, et al. Enhanced SARS-CoV-2 Neutralization by Secretory IgA  
378 in vitro. *bioRxiv.* 2020.
- 379 16. Hicks J, Klumpp-Thomas C, Kalish H, et al. Serologic cross-reactivity of SARS-CoV-2 with  
380 endemic and seasonal Betacoronaviruses. *medRxiv.* 2020.
- 381 17. Esposito D, Mehalko J, Drew M, et al. Optimizing high-yield production of SARS-CoV-2 soluble  
382 spike trimers for serology assays. *Protein Expression and Purification.* 2020:105686.
- 383 18. Mehalko J, Drew M, Snead K, et al. Improved production of SARS-CoV-2 spike receptor-binding  
384 domain (RBD) for serology assays. *Protein expression and purification.* 2020:105802.
- 385 19. Centers for Disease Control and Prevention (CDC) AG. Behavioral Risk Factor Surveillance  
386 System Survey Questionnaire and Data. In: U.S. Department of Health and Human Services  
387 CfDcAp, ed2020.
- 388 20. Dong E, Du H, Gardner L. An interactive web-based dashboard to track COVID-19 in real time.  
389 *The Lancet infectious diseases.* 2020;20(5):533-534.
- 390 21. Mehra MR, Desai SS, Kuy S, Henry TD, Patel AN. Cardiovascular Disease, Drug Therapy, and  
391 Mortality in Covid-19. *New England Journal of Medicine.* 2020;382(25):e102.
- 392 22. Rostami A, Sepidarkish M, Leeftang MMG, et al. SARS-CoV-2 seroprevalence worldwide: a  
393 systematic review and meta-analysis. *Clin Microbiol Infect.* 2020.

- 394 23. Caini S, Bellerba F, Corso F, et al. Meta-analysis of diagnostic performance of serological tests for  
395 SARS-CoV-2 antibodies up to 25 April 2020 and public health implications. *Euro Surveill.*  
396 2020;25(23).
- 397 24. Kontou PI, Braliou GG, Dimou NL, Nikolopoulos G, Bagos PG. Antibody Tests in Detecting  
398 SARS-CoV-2 Infection: A Meta-Analysis. *Diagnostics (Basel)*. 2020;10(5).
- 399 25. Lee CY, Lin RTP, Renia L, Ng LFP. Serological Approaches for COVID-19: Epidemiologic  
400 Perspective on Surveillance and Control. *Front Immunol*. 2020;11:879.
- 401 26. Lisboa Bastos M, Tavaziva G, Abidi SK, et al. Diagnostic accuracy of serological tests for covid-  
402 19: systematic review and meta-analysis. *BMJ*. 2020;370:m2516.
- 403 27. Biggs HM, Harris JB, Breakwell L, et al. Estimated community seroprevalence of SARS-CoV-2  
404 antibodies—two Georgia counties, April 28–May 3, 2020. *Morbidity and Mortality Weekly Report*.  
405 2020;69(29):965.
- 406 28. Bryan A, Pepper G, Wener MH, et al. Performance characteristics of the Abbott Architect SARS-  
407 CoV-2 IgG assay and seroprevalence in Boise, Idaho. *Journal of clinical microbiology*. 2020.
- 408 29. Dietrich ML, Norton EB, Elliott D, et al. SARS-CoV-2 Seroprevalence Rates of Children in  
409 Louisiana During the State Stay at Home Order. *medRxiv*. 2020.
- 410 30. Feehan AK, Fort D, Garcia-Diaz J, et al. Seroprevalence of SARS-CoV-2 and infection fatality  
411 ratio, Orleans and Jefferson Parishes, Louisiana, USA, May 2020. *Emerging infectious diseases*.  
412 2020;26(11):2765.
- 413 31. Havers FP, Reed C, Lim T, et al. Seroprevalence of antibodies to SARS-CoV-2 in 10 sites in the  
414 United States, March 23-May 12, 2020. *JAMA*. 2020;180(12):1576-1586.
- 415 32. McLaughlin CC, Doll MK, Morrison KT, et al. High community SARS-CoV-2 antibody  
416 seroprevalence in a ski resort community, Blaine County, Idaho, US. preliminary results. *Medrxiv*.  
417 2020.
- 418 33. Menachemi N, Yiannoutsos CT, Dixon BE, et al. Population point prevalence of SARS-CoV-2  
419 infection based on a statewide random sample—Indiana, April 25–29, 2020. *Morbidity and*  
420 *Mortality Weekly Report*. 2020;69(29):960.
- 421 34. Ng DL, Goldgof GM, Shy BR, et al. SARS-CoV-2 seroprevalence and neutralizing activity in  
422 donor and patient blood. *Nature communications*. 2020;11(1):1-7.
- 423 35. Rosenberg ES, Tesoriero JM, Rosenthal EM, et al. Cumulative incidence and diagnosis of SARS-  
424 CoV-2 infection in New York. *medRxiv*. 2020.
- 425 36. Sood N, Simon P, Ebner P, et al. Seroprevalence of SARS-CoV-2–Specific Antibodies Among  
426 Adults in Los Angeles County, California, on April 10-11, 2020. *Jama*. 2020.
- 427 37. Sutton M, Cieslak P, Linder M. Notes from the Field: Seroprevalence Estimates of SARS-CoV-2  
428 Infection in Convenience Sample—Oregon, May 11–June 15, 2020. *Morbidity and Mortality*  
429 *Weekly Report*. 2020;69(32):1100.
- 430 38. Elliott MR, Valliant R. Inference for nonprobability samples. *Statistical Science*. 2017;32(2):249-  
431 264.
- 432 39. Hill D. The dirty little secret pollsters need to own up to. *The Washington Post*. 2020.  
433
